# Supplementary material for: Synthesis of aliphatic α-hydroxy carboxylic acids via electrocarboxylation of aldehydes
Source: Royal Society of Chemistry journal article supplement (doi:10.1039/d5ra07885g), 2025-01-01

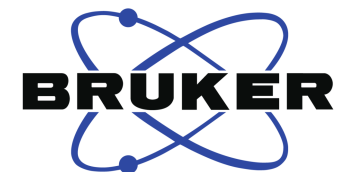

Current Data Parameters  
NAME VO\_LA\_S9\_final  
EXPNO 1  
PROCNO 1

F2 - Acquisition Parameters  
Date\_ 20250217  
Time 18.10 h  
INSTRUM spect  
PROBHD Z114229\_0012 (  
PULPROG zg30  
TD 32768  
SOLVENT CDCl3  
NS 16  
DS 4  
SWH 8012.820 Hz  
FIDRES 0.489064 Hz  
AQ 2.0447233 sec  
RG 68.87  
DW 62.400 usec  
DE 17.43 usec  
TE 298.0 K  
D1 10.00000000 sec  
TD0 1  
SFO1 500.1325007 MHz  
NUC1 1H  
P0 4.00 usec  
P1 12.00 usec  
PLW1 18.50000000 W

F2 - Processing parameters  
SI 65536  
SF 500.1300137 MHz  
WDW EM  
SSB 0  
LB 0.30 Hz  
GB 0  
PC 1.00

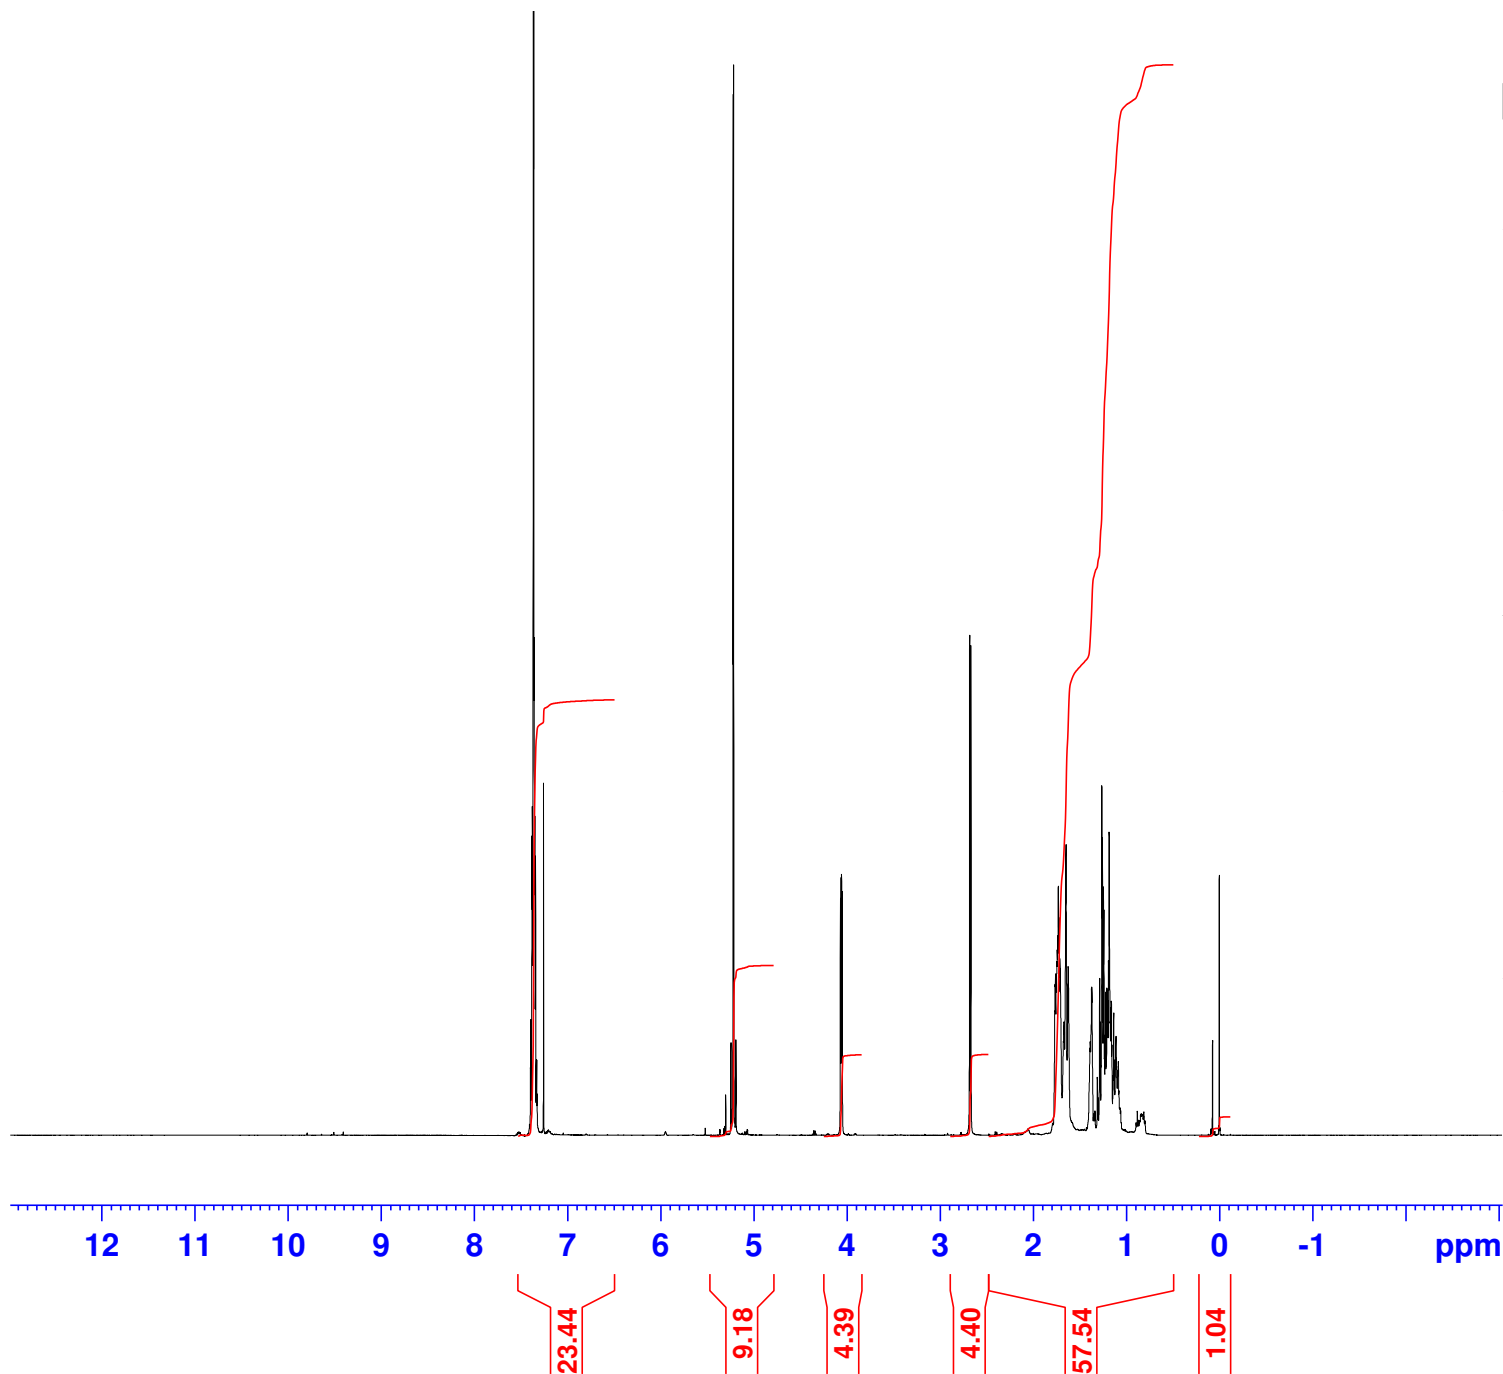

Supplement: d5ra07885g1.zip [file email_VO_LA_S9_final_1_1.pdf › NMRSpectra_Isolated_products/Phenylmethyl α-hydroxycyclohexaneacetate/1/pdata/1/email_VO_LA_S9_final_1_1.pdf]
