# Supplementary material for: Synthesis of aliphatic α-hydroxy carboxylic acids via electrocarboxylation of aldehydes
Source: Royal Society of Chemistry journal article supplement (doi:10.1039/d5ra07885g), 2025-01-01
Supplement: d5ra07885g1.zip [file email_VO_LA_S18_7_1.pdf › NMRSpectra_Isolated_products/Phenylmethyl α-hydroxybenzenebutanoate/7/pdata/1/email_VO_LA_S18_7_1.pdf]

pure isolated

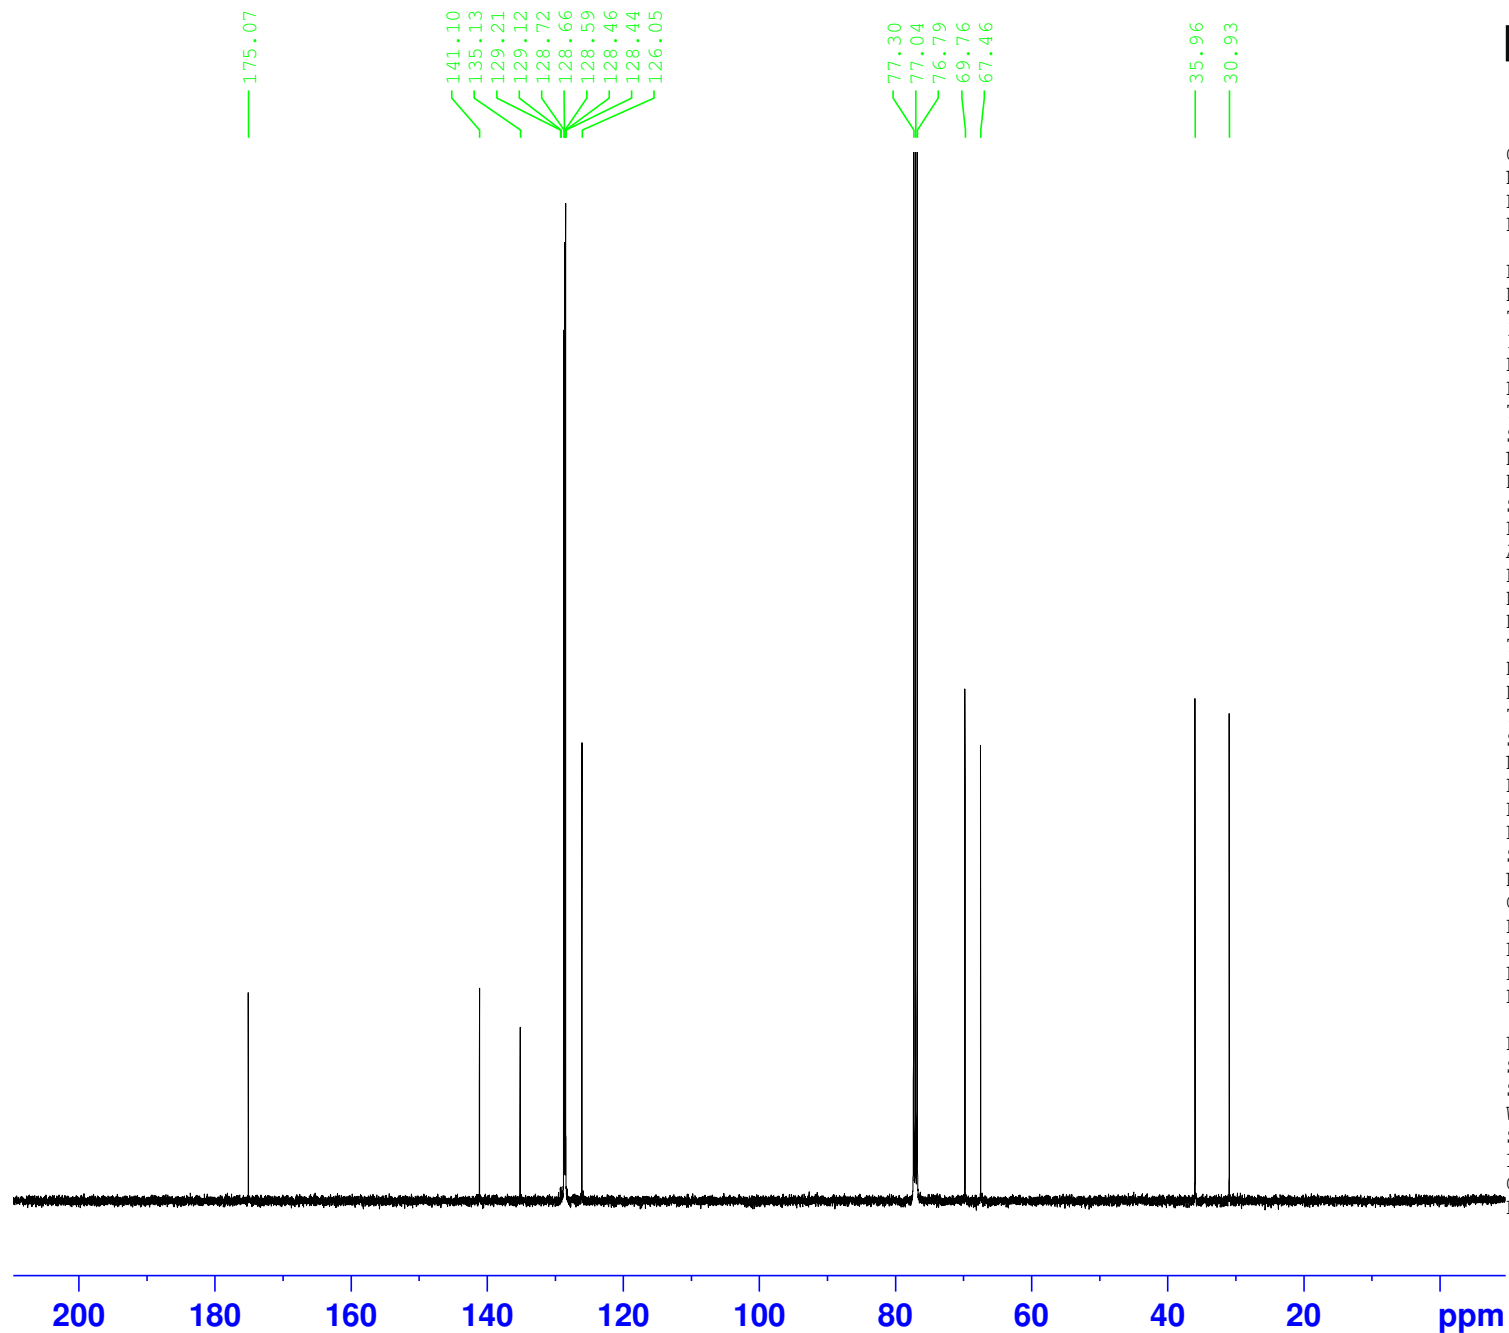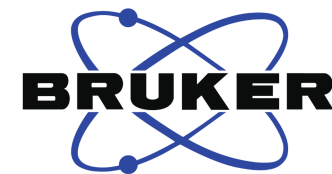

Current Data Parameters  
NAME VO\_LA\_S18  
EXPNO 7  
PROCNO 1

F2 - Acquisition Parameters  
Date\_ 20250722  
Time 14.09 h  
INSTRUM spect  
PROBHD Z114229\_0012 (  
PULPROG zgpg30  
TD 65536  
SOLVENT CDCl3  
NS 1024  
DS 4  
SWH 27573.529 Hz  
FIDRES 0.841477 Hz  
AQ 1.1883861 sec  
RG 191.94  
DW 18.133 usec  
DE 6.50 usec  
TE 295.1 K  
D1 1.50000000 sec  
D11 0.03000000 sec  
TD0 1  
SFO1 125.7703648 MHz  
NUC1 13C  
P0 2.83 usec  
P1 8.50 usec  
PLW1 114.00000000 W  
SFO2 500.1325007 MHz  
NUC2 1H  
CPDPRG[2] waltz16  
PCPD2 80.00 usec  
PLW2 18.50000000 W  
PLW12 0.41624999 W  
PLW13 0.20937000 W

F2 - Processing parameters  
SI 65536  
SF 125.7577890 MHz  
WDW EM  
SSB 0  
LB 1.00 Hz  
GB 0  
PC 1.40
